# Supplementary material
Source: publisher site journal article supplement (https://www.dovepress.com/article/400986)
Supplement: Supplementary file 1 [file get_supplementary_file.php]

**Personalized dose of adjuvant imatinib in patients with  
gastrointestinal stromal tumors: results from a population  
pharmacokinetic analysis**

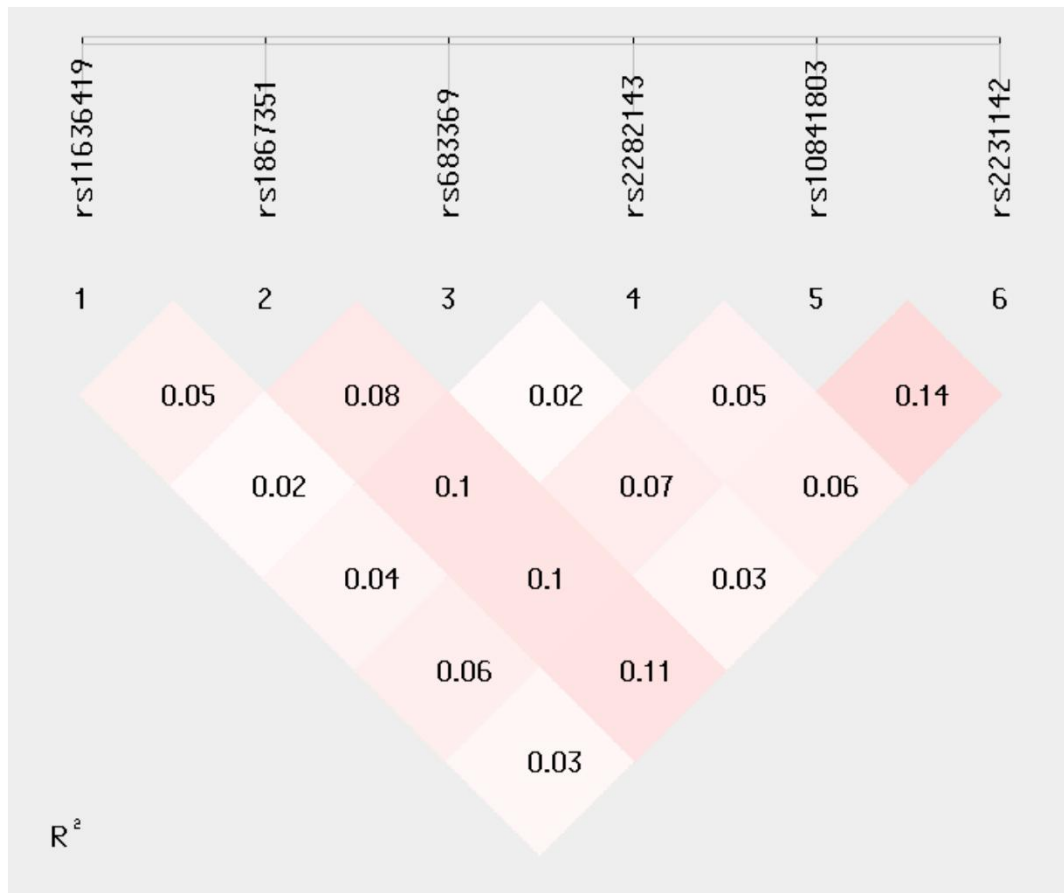

**Supplementary Figure 1** Pairwise linkage profiles of rs11636419, rs1867351, rs683369, rs2282143, rs10841803, and rs2231142. The number inside the rhombus indicates the  $R^2$  of the specific linkage of two SNPs.  $R^2 > 0.8$  is considered to be linked.

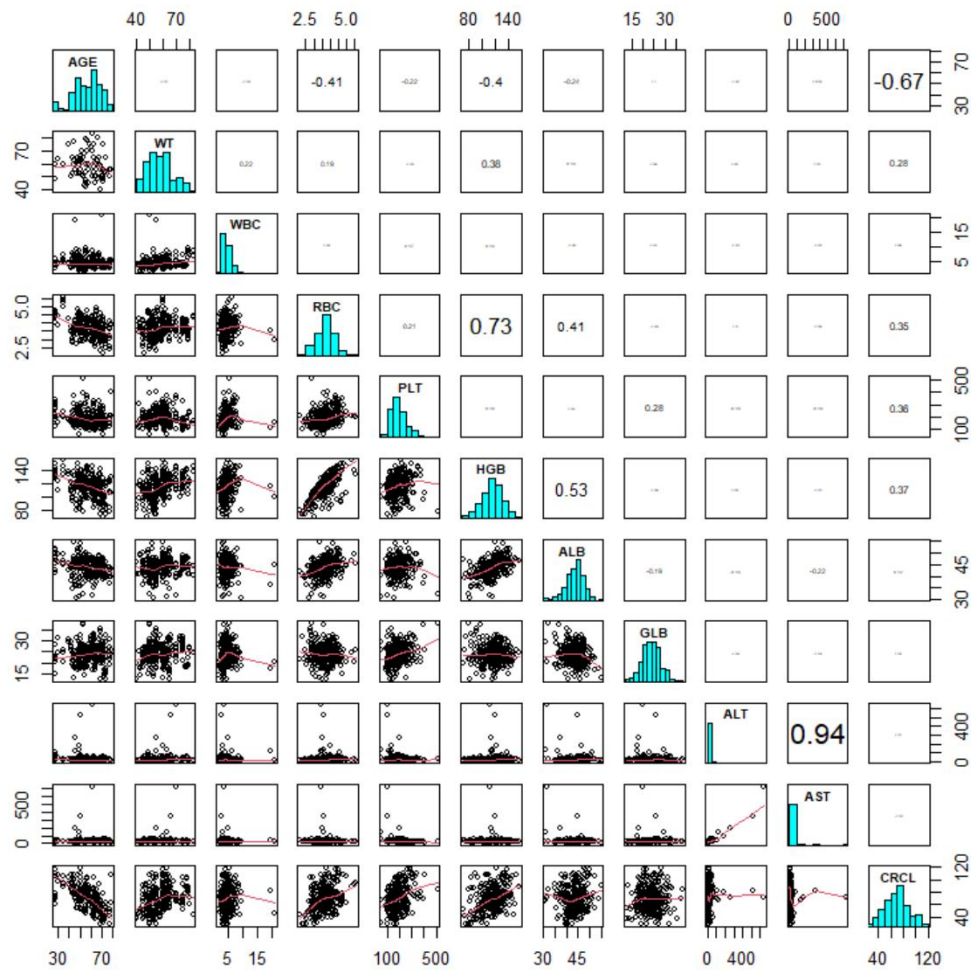

**Supplementary Figure 2** Covariate correlation analysis plot. The number in the box represents the correlation coefficient of the corresponding two covariates, and an absolute value of the correlation coefficient  $\geq 0.5$  is considered to indicate a correlation between the two covariates.
